# Supplementary material for: Ifosfamide, Carboplatin, and Etoposide (ICE) in Combination with Regional Hyperthermia as Salvage Therapy in Patients with Locally Advanced Nonmetastatic and Metastatic Soft-Tissue Sarcoma
Source: Hindawi journal article supplement (doi:10.1155/2020/6901678), 2020-03-01
Supplement: f1 [file 6901678.f1.pdf]

## 1 Supplementary material

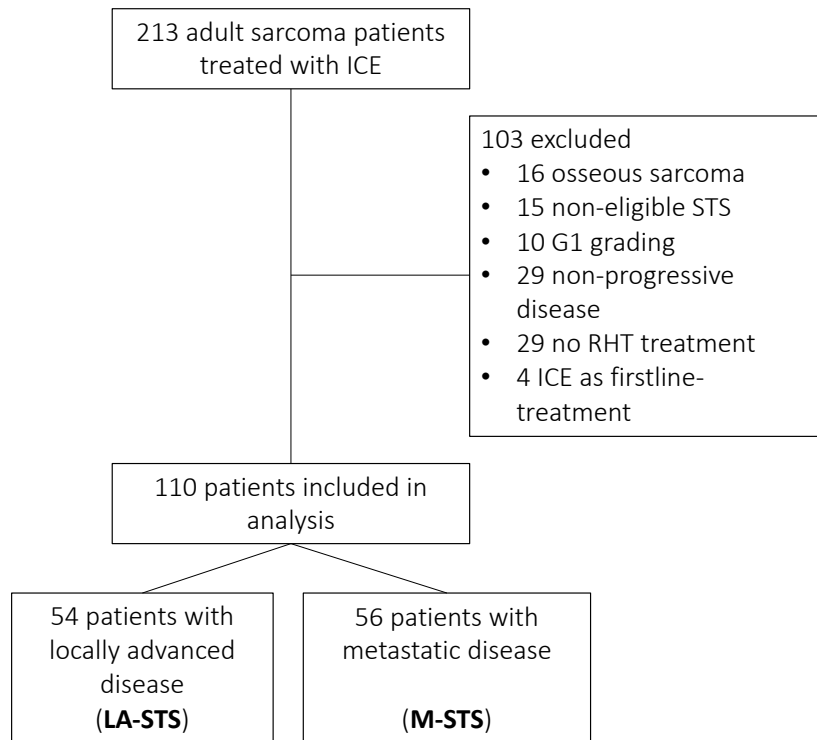

2 Supplementary Figure 1: Selected patient populations. **Abbreviations:** STS: soft-tissue sarcoma

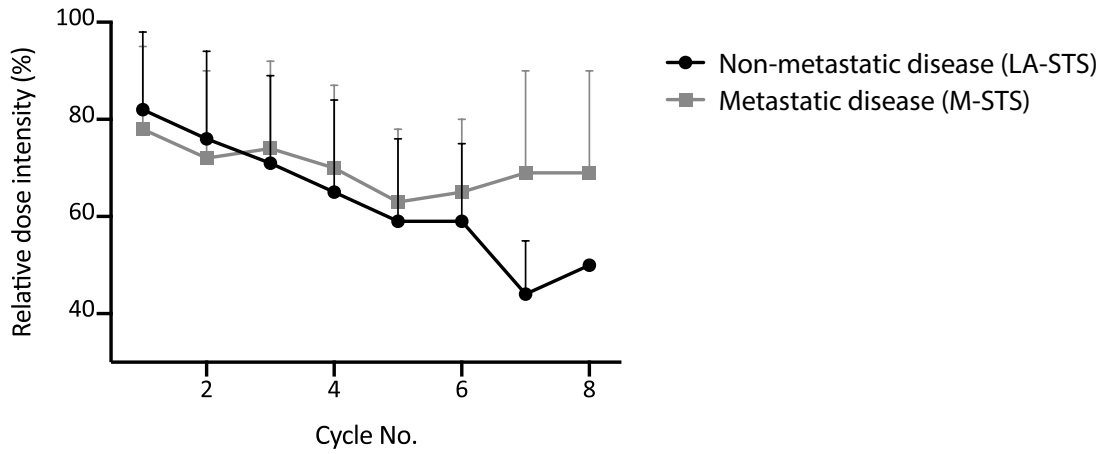

3 Supplementary Figure 2: Relative dose intensity of applied ICE cycles. Full-dosed ICE (as described in the  
4 patients and methods paragraph) over four days was considered 100%.

5 Supplementary Table 1: Prognostic factors for progression-free survival for LA-STs patients. P values were  
6 calculated using the log-rank test for univariate analysis. For multivariate analysis using a Cox model, only  
7 parameters with a p <0.10 in univariate analyses were considered. **Abbreviations:** HR: Hazard ratio, mo:  
8 months, NA: not assessable, OS: overall survival.

| Parameter                                                                        | N  | Univariate analysis     |                   | Cox model         |                  |
|----------------------------------------------------------------------------------|----|-------------------------|-------------------|-------------------|------------------|
|                                                                                  |    | Median PFS, mo (95% CI) | p                 | HR (95% CI)       | p                |
| <b>Age</b>                                                                       |    |                         | 0.29              |                   |                  |
| >50 years                                                                        | 38 | 10 (8-15)               |                   |                   |                  |
| ≤50 years                                                                        | 16 | 9 (6-29)                |                   |                   |                  |
| <b>Sex</b>                                                                       |    |                         | 0.49              |                   |                  |
| Male                                                                             | 31 | 10 (8-12)               |                   |                   |                  |
| Female                                                                           | 23 | 9 (6-22)                |                   |                   |                  |
| <b>Treatment line</b>                                                            |    |                         | 0.15              |                   |                  |
| 2 <sup>nd</sup> line                                                             | 46 | 10 (9-15)               |                   |                   |                  |
| > 2 <sup>nd</sup> line                                                           | 8  | 9 (6-NA)                |                   |                   |                  |
| <b>Grading</b>                                                                   |    |                         | <b>0.003</b>      | 3.10 (1.028-9.34) | <b>0.045</b>     |
| 3                                                                                | 32 | 9 (5-10)                |                   |                   |                  |
| 2                                                                                | 22 | 20 (11-36)              |                   |                   |                  |
| <b>Histologic sub-entity</b>                                                     |    |                         | <b>0.043</b>      | 0.88 (0.395-1.98) | 0.762            |
| Lipo-/Leiomyosarcoma                                                             | 28 | 11 (6-29)               |                   |                   |                  |
| Non-Lipo-/Leiomyosarcoma                                                         | 26 | 9 (7-11)                |                   |                   |                  |
| <b>Surgery</b>                                                                   |    |                         | <b>0.008</b>      | 0.45 (0.196-1.02) | 0.054            |
| Yes                                                                              | 31 | 11 (9-21)               |                   |                   |                  |
| No                                                                               | 23 | 8 (5-11)                |                   |                   |                  |
| <b>Response/Disease stabilization as best radiographic response with ICE+RHT</b> |    |                         | <b>&lt;0.0001</b> | 0.15 (0.054-0.39) | <b>&lt;0.001</b> |
| Yes                                                                              | 26 | 10 (9-27)               |                   |                   |                  |
| No                                                                               | 9  | 3 (2-NA)                |                   |                   |                  |
| <b>Type of progression</b>                                                       |    |                         | <b>0.0002</b>     | 0.42 (0.175-0.99) | <b>0.048</b>     |
| Progression after response to prior chemotherapy                                 | 32 | 11 (9-27)               |                   |                   |                  |
| Primary refractory disease                                                       | 22 | 5 (4-10)                |                   |                   |                  |

9

10 Supplementary Table 2: Prognostic factors for overall survival for M-STS patients. P values were calculated  
 11 using the log-rank test for univariate analysis. For multivariate analysis using a Cox model, only parameters with  
 12 a p <0.10 in univariate analyses were considered. **Abbreviations:** HR: Hazard ratio, mo: months, NA: not  
 13 assessable, OS: overall survival.

| Parameter                                                                        | N  | Univariate analysis    |         | Cox model        |       |
|----------------------------------------------------------------------------------|----|------------------------|---------|------------------|-------|
|                                                                                  |    | Median OS, mo (95% CI) | p       | HR (95% CI)      | p     |
| <b>Age</b>                                                                       |    |                        | 0.24    |                  |       |
| >50 years                                                                        | 27 | 15 (11-27)             |         |                  |       |
| ≤50 years                                                                        | 29 | 11 (8-19)              |         |                  |       |
| <b>Sex</b>                                                                       |    |                        | 0.56    |                  |       |
| Male                                                                             | 26 | 11 (7-19)              |         |                  |       |
| Female                                                                           | 30 | 13 (10-31)             |         |                  |       |
| <b>Treatment line</b>                                                            |    |                        | 0.12    |                  |       |
| 2 <sup>nd</sup> line                                                             | 40 | 11 (8-17)              |         |                  |       |
| > 2 <sup>nd</sup> line                                                           | 16 | 15 (11-42)             |         |                  |       |
| <b>Grading</b>                                                                   |    |                        | 0.07    | 1.33 (0.68-2.60) | 0.406 |
| 3                                                                                | 39 | 10 (7-19)              |         |                  |       |
| 2                                                                                | 17 | 15 (13-NA)             |         |                  |       |
| <b>Histologic sub-entity</b>                                                     |    |                        | 0.19    |                  |       |
| Lipo-/Leiomyosarcoma                                                             | 22 | 11 (7-17)              |         |                  |       |
| Non-Lipo-/Leiomyosarcoma                                                         | 34 | 17 (11-34)             |         |                  |       |
| <b>Surgery</b>                                                                   |    |                        | 0.52    |                  |       |
| Yes                                                                              | 15 | 15 (11-35)             |         |                  |       |
| No                                                                               | 41 | 11 (7-19)              |         |                  |       |
| <b>Response/Disease stabilization as best radiographic response with ICE+RHT</b> |    |                        | <0.0001 | 0.36 (0.19-0.70) | 0.002 |
| Yes                                                                              | 26 | 18 (15-35)             |         |                  |       |
| No                                                                               | 24 | 7 (5-19)               |         |                  |       |
| <b>Type of progression</b>                                                       |    |                        | 0.33    |                  |       |
| Progression after response to prior chemotherapy                                 | 19 | 15 (11-34)             |         |                  |       |
| Primary refractory disease                                                       | 37 | 10 (7-17)              |         |                  |       |

14
